# Supplementary material for: Briarenolides K and L, New Anti-Inflammatory Briarane Diterpenoids from an Octocoral Briareum sp. (Briareidae)
Source: MDPI journal article supplement (doi:10.3390/md13021037), 2015-02-13
Supplement: s1 [file s1]

## Supplementary Information

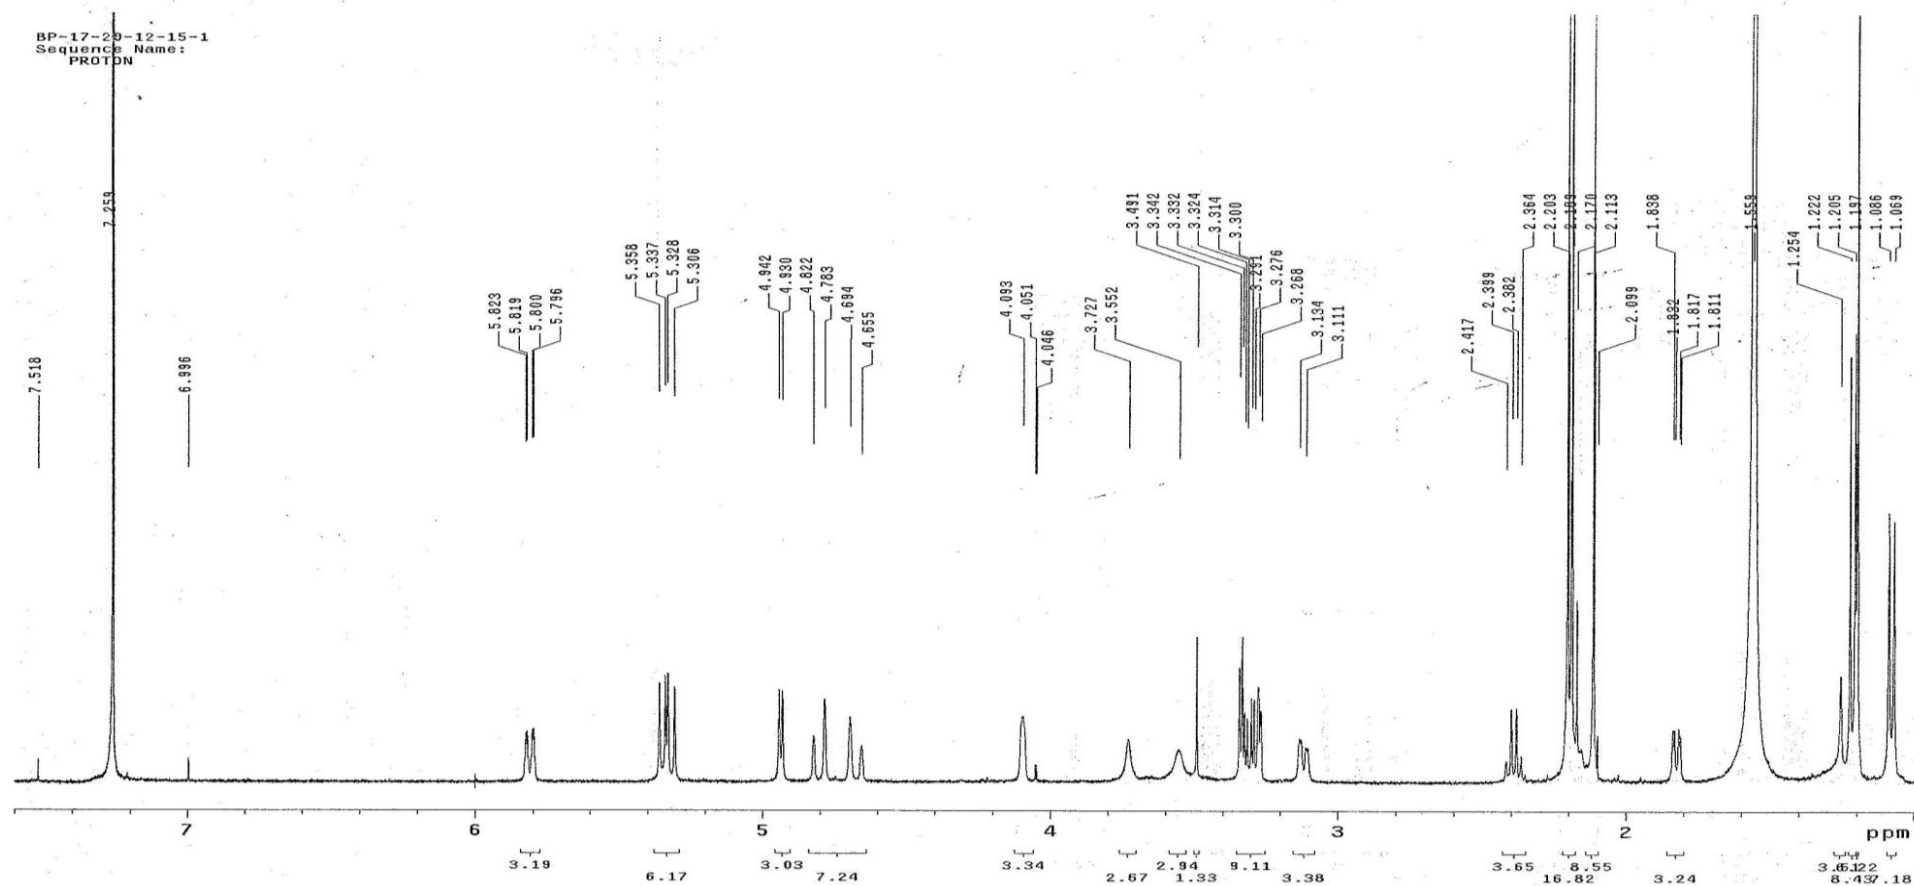

**Figure S1.**  $^1\text{H}$  NMR spectrum (400 MHz) of compound **1** in  $\text{CDCl}_3$ .

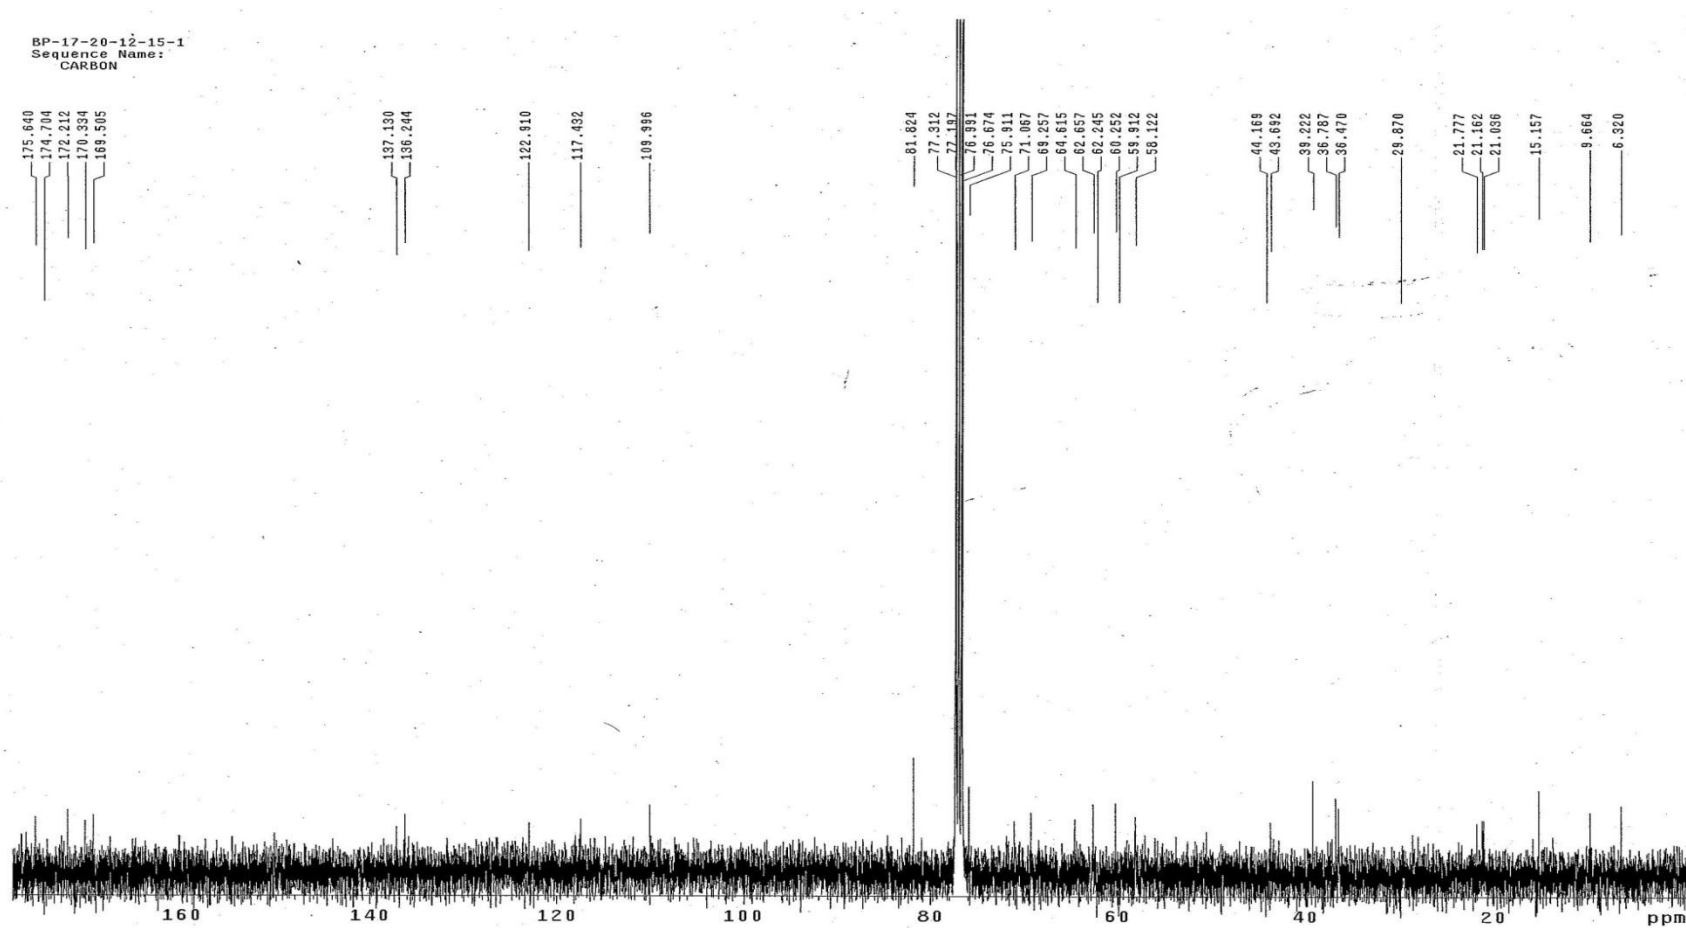

**Figure S2.**  $^{13}\text{C}$  NMR spectrum (100 MHz) of compound **1** in  $\text{CDCl}_3$ .

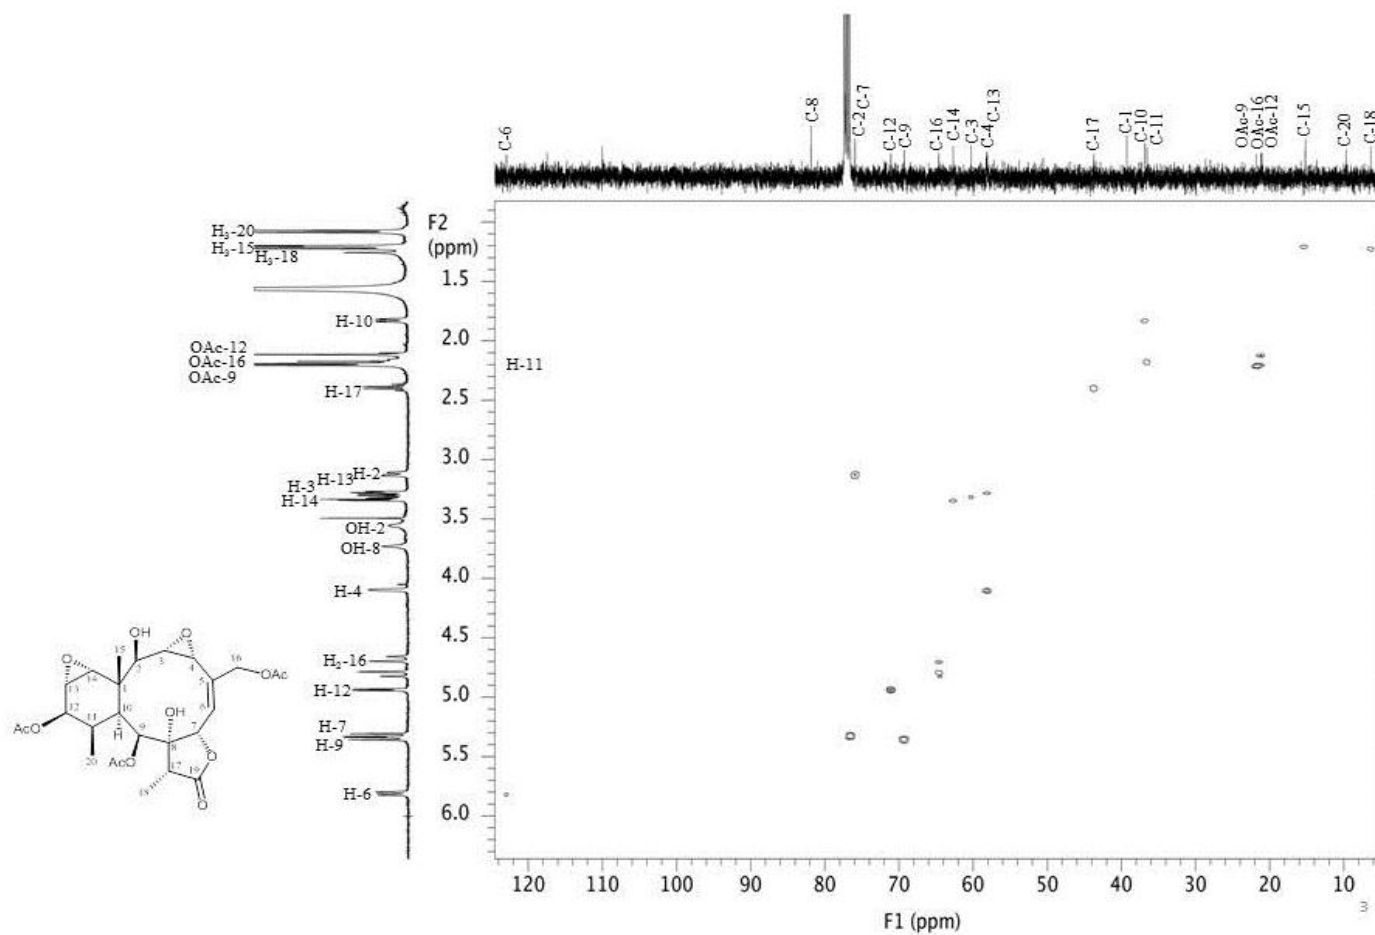

**Figure S3.** gHSQC spectrum (400 MHz) of compound 1 in CDCl<sub>3</sub>.

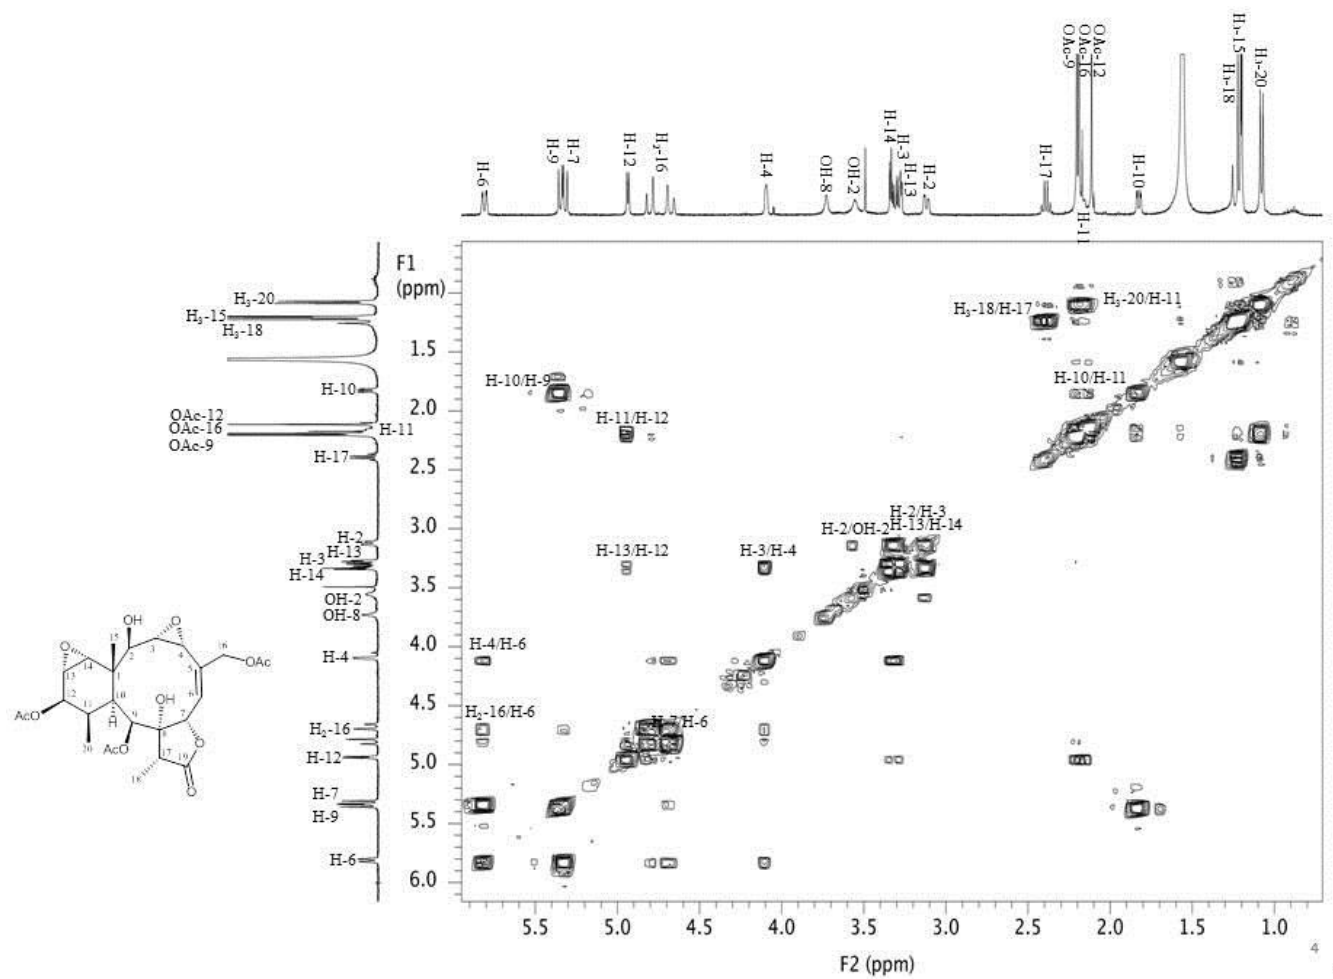

**Figure S4.** COSY spectrum (400 MHz) of compound **1** in CDCl<sub>3</sub>.

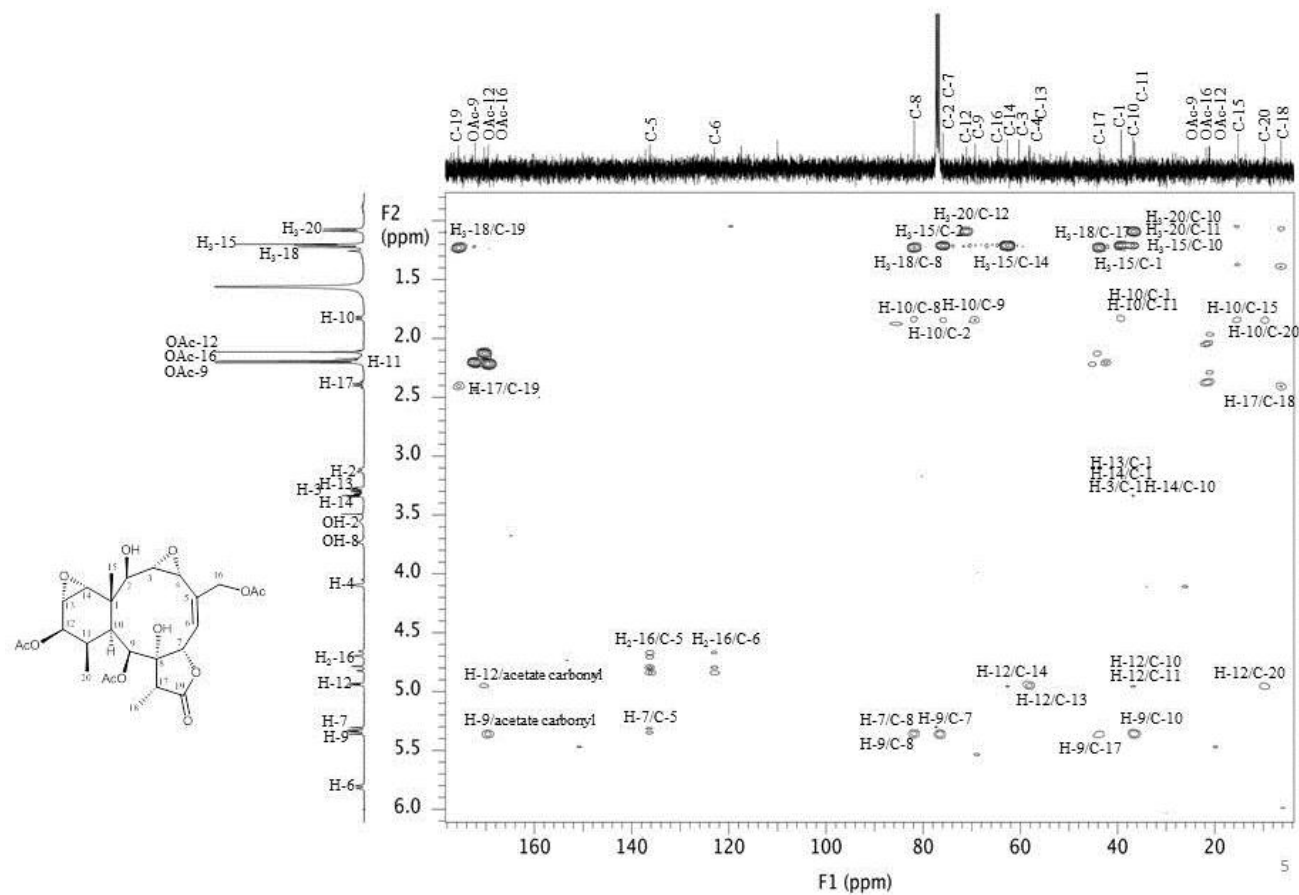

**Figure S5.** gHMBC spectrum (400 MHz) of compound **1** in CDCl<sub>3</sub>.

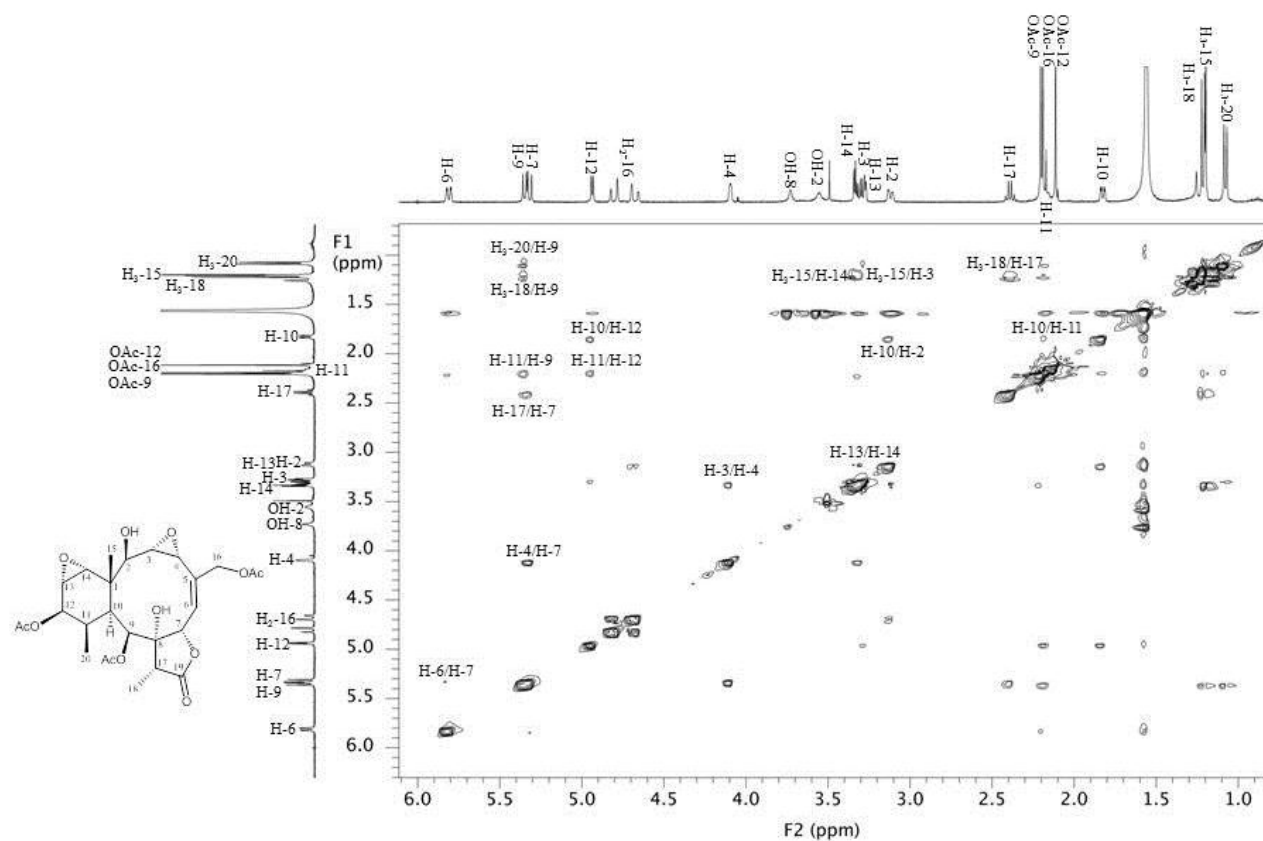

**Figure S6.** NOESY spectrum (400 MHz) of compound **1** in CDCl<sub>3</sub>.

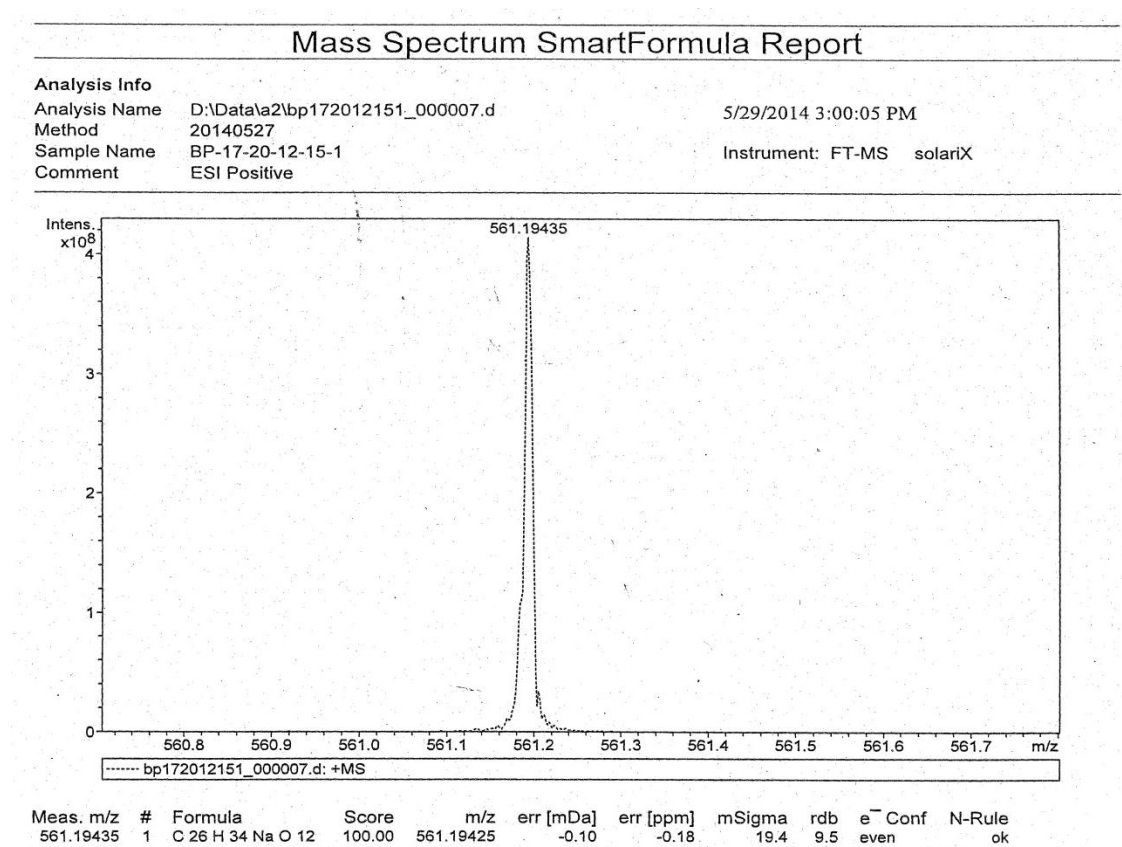

**Figure S7.** HRMS of compound **1**.

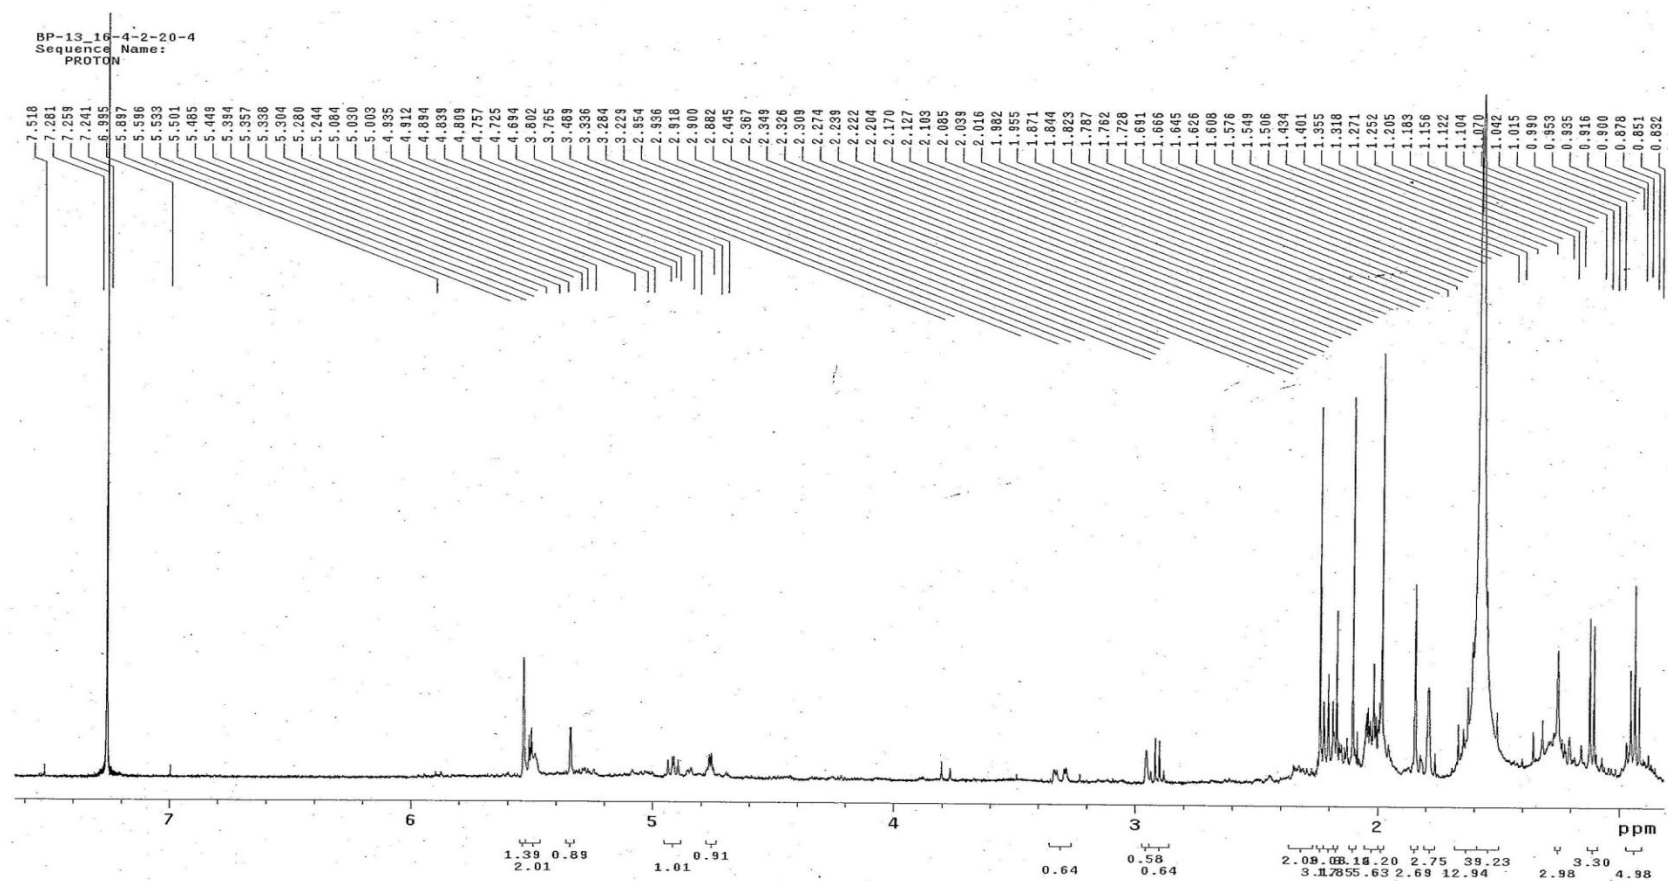

**Figure S8.**  $^1\text{H}$  NMR spectrum (400 MHz) of compound **2** in  $\text{CDCl}_3$ .



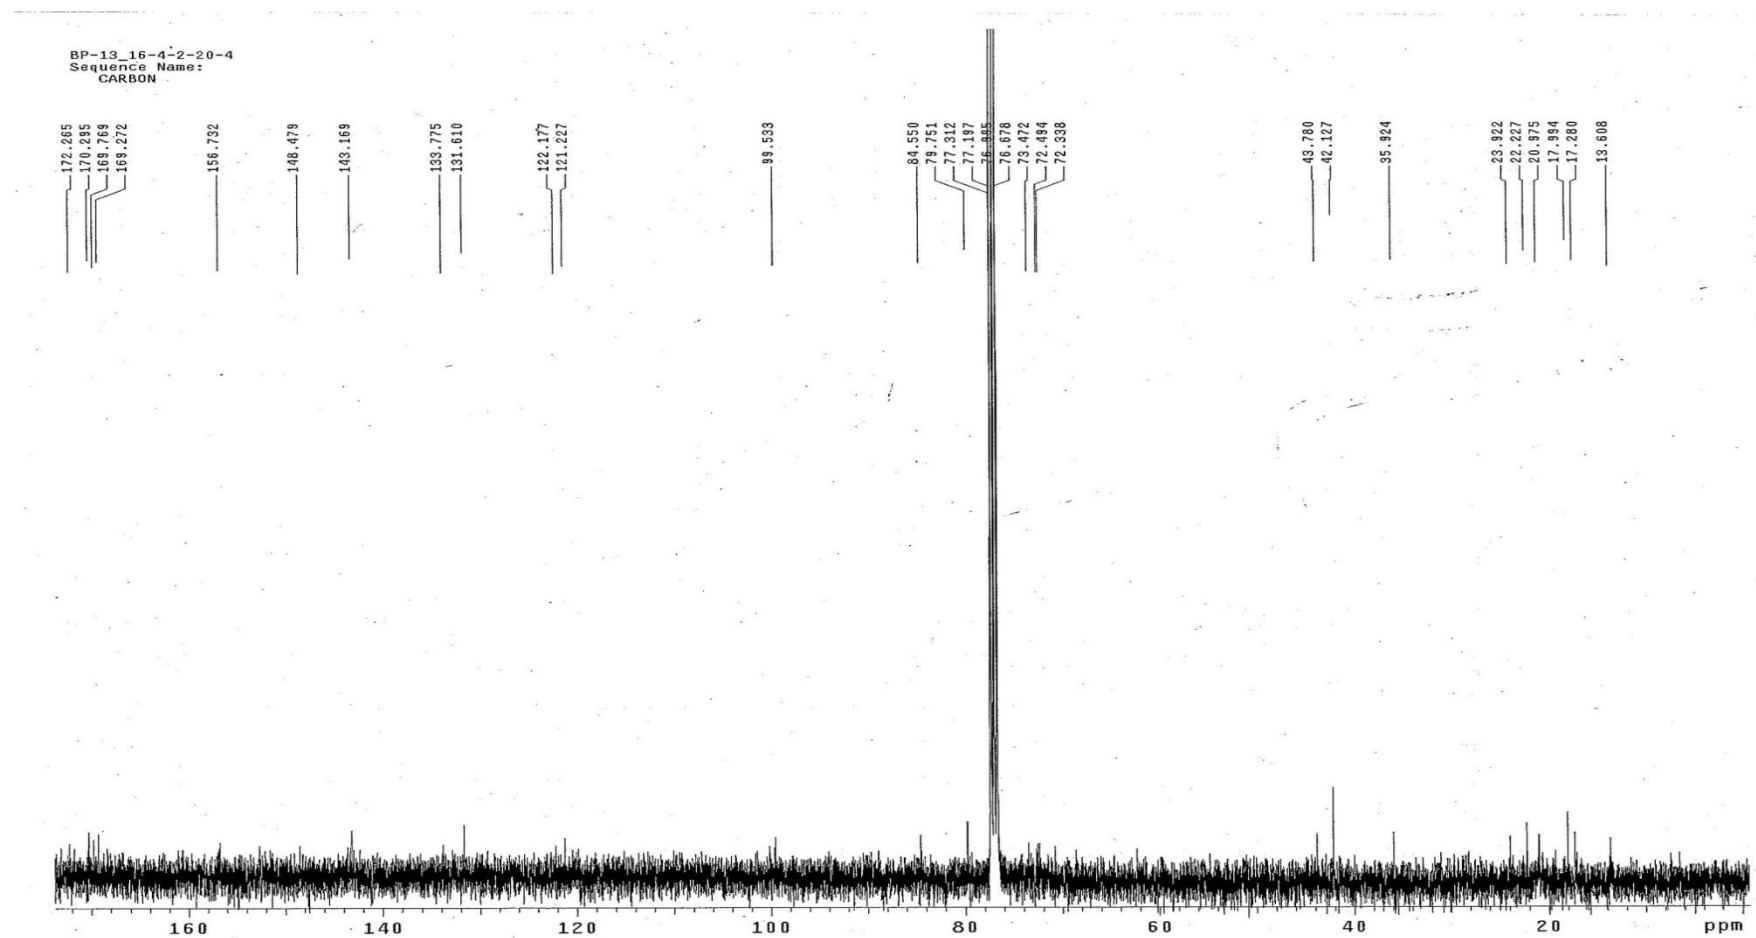

**Figure S9.**  $^{13}\text{C}$  NMR spectrum (100 MHz) of compound **2** in  $\text{CDCl}_3$ .

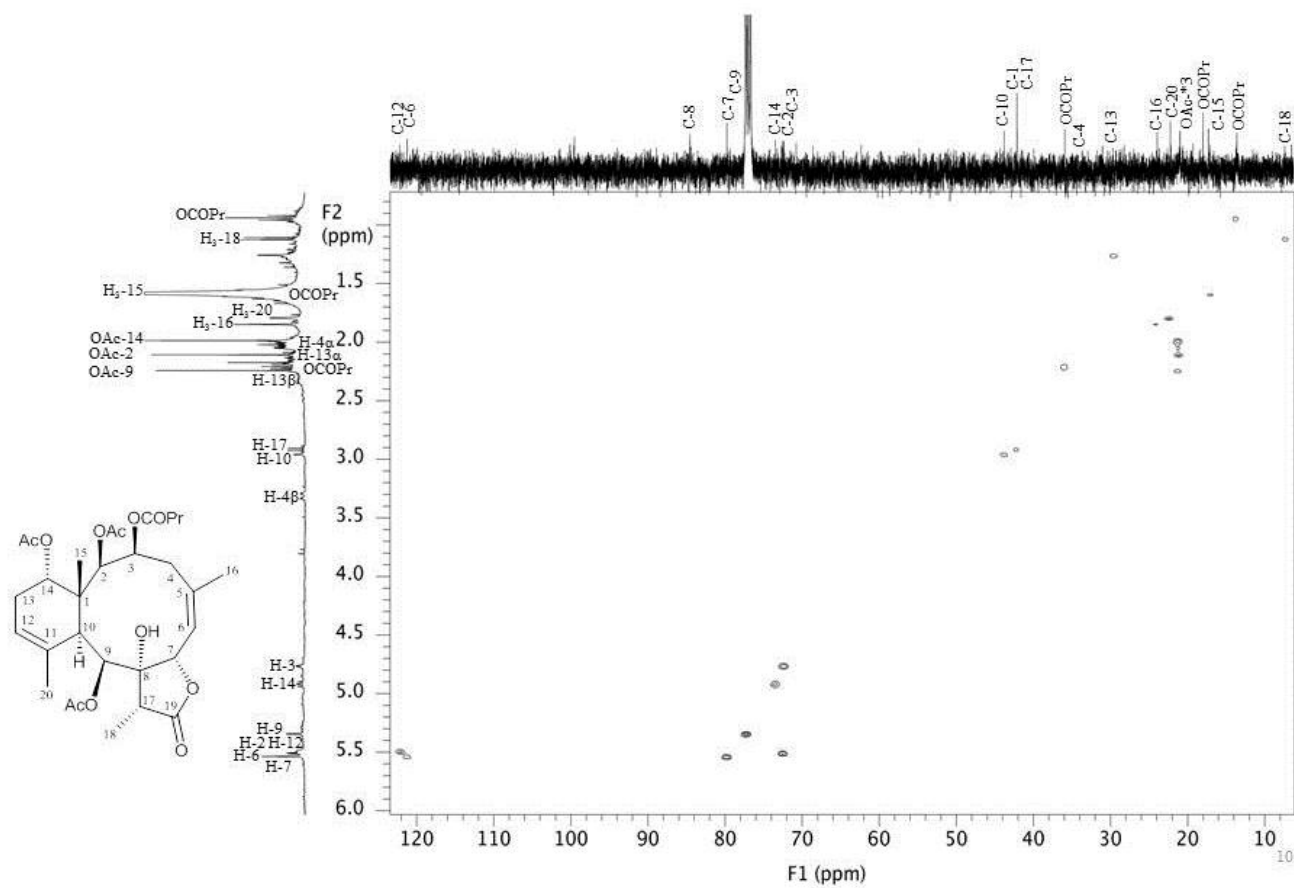

**Figure S10.** gHSQC spectrum (400 MHz) of compound **2** in CDCl<sub>3</sub>.

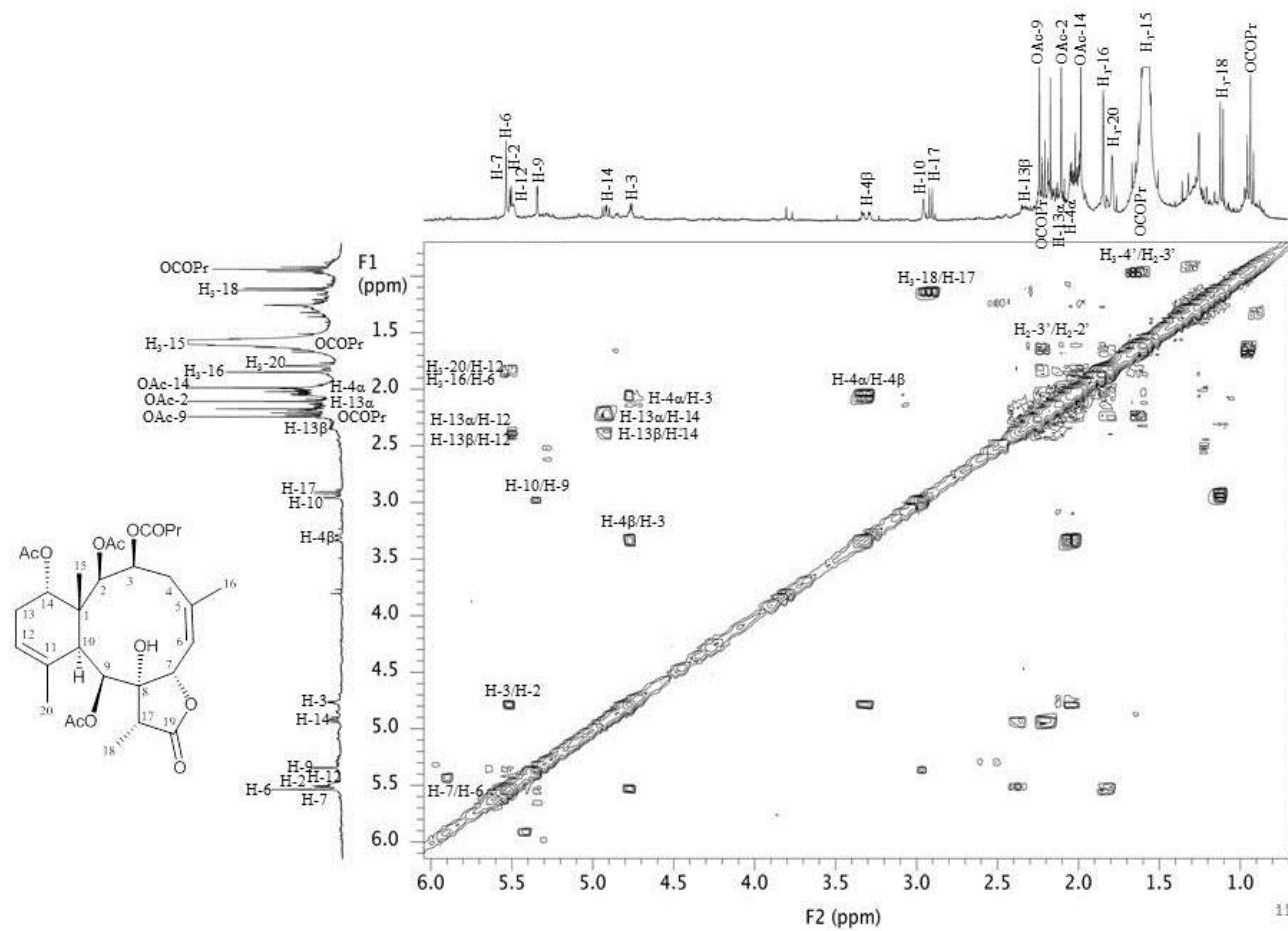

**Figure S11.** COSY spectrum (400 MHz) of compound **2** in CDCl<sub>3</sub>.

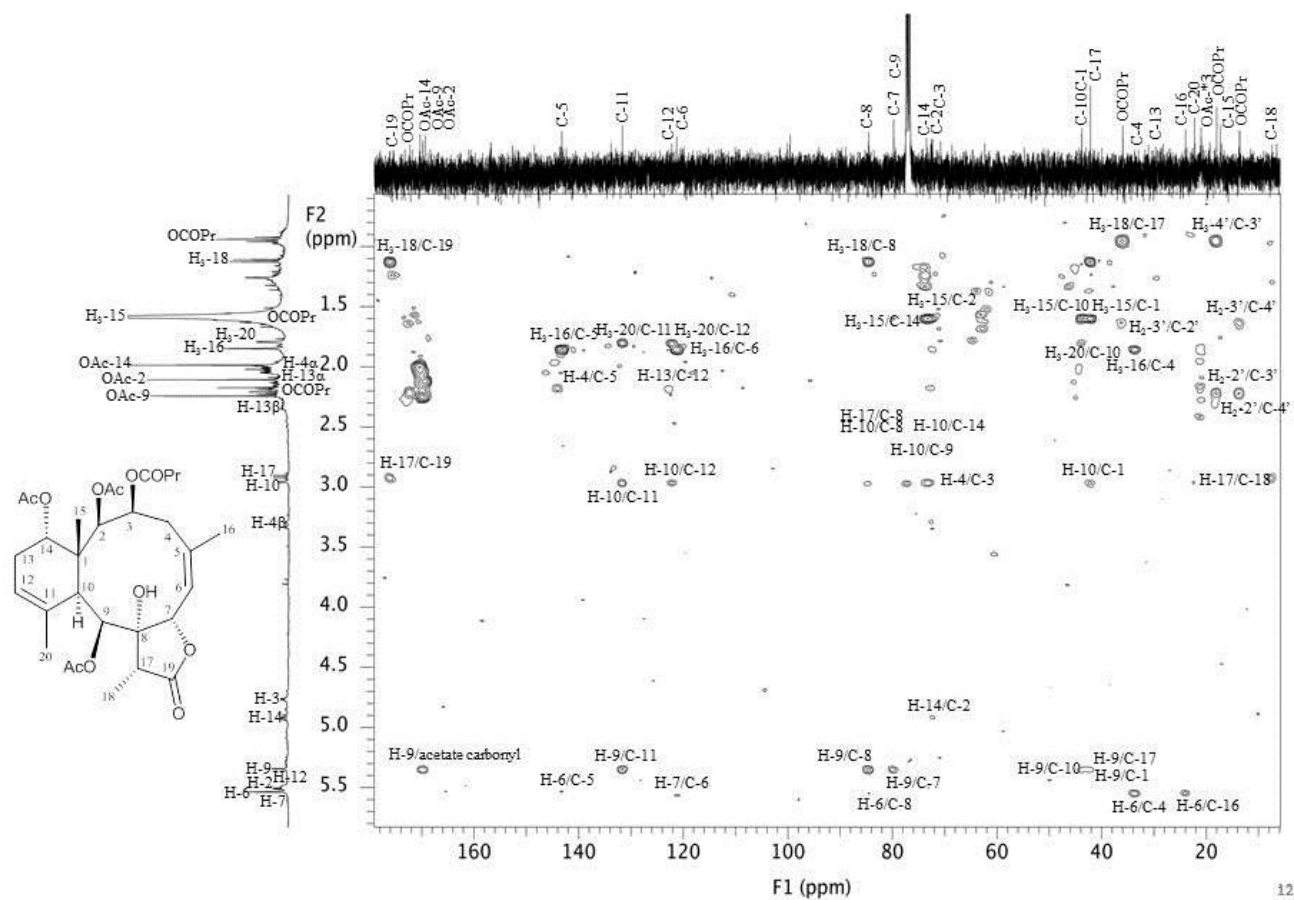

**Figure S12.** gHMBC spectrum (400 MHz) of compound **2** in CDCl<sub>3</sub>.

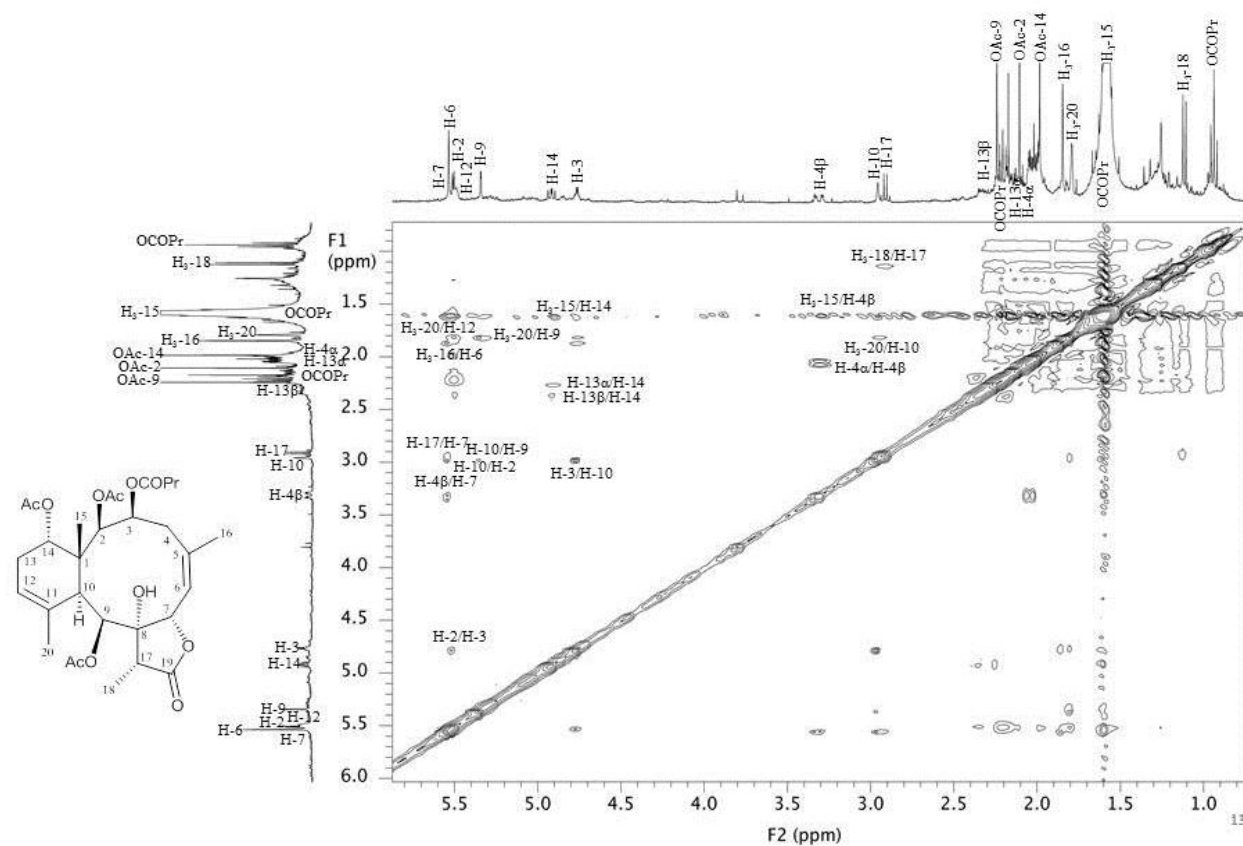

**Figure S13.** NOESY spectrum (400 MHz) of compound **2** in CDCl<sub>3</sub>.

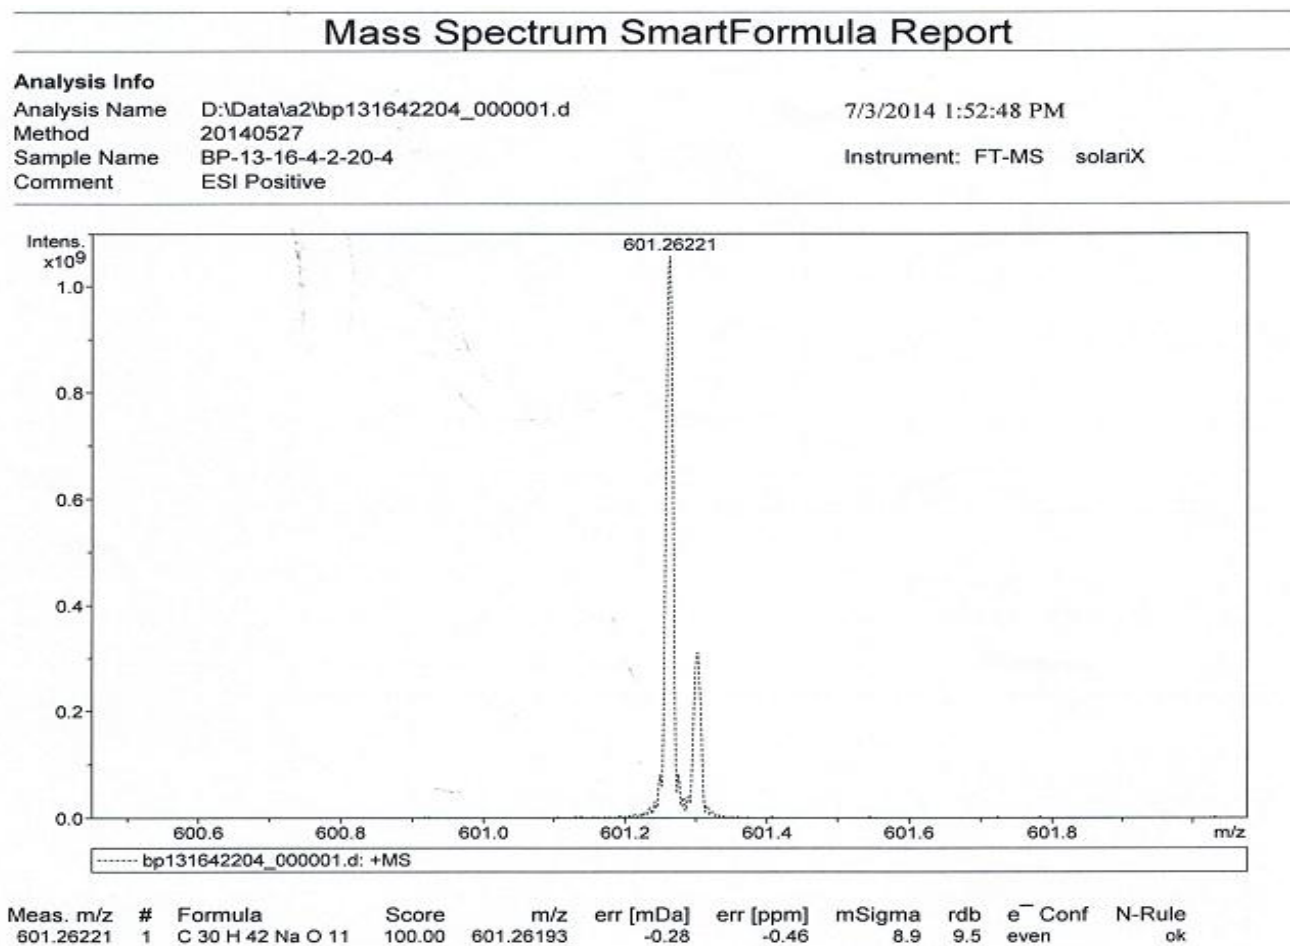

**Figure S14.** HRMS of compound 2.
